# Supplementary material for: Human liver stem cell‐derived extracellular vesicles reduce injury in a model of normothermic machine perfusion of rat livers previously exposed to a prolonged warm ischemia
Source: PubMed Central journal article supplement — Transpl Int. 2021 Aug 26;34(9):1607–17. doi: 10.1111/tri.13980 (PMC9291857; doi:10.1111/tri.13980), 2021-08-26
Supplement: TRI-34-1607-s001.pdf [file TRI-34-1607-s001.pdf]

### **Table S1:** RNA EXTRACTION AND REAL TIME POLYMERASE CHAIN REACTION

RNA extraction was performed on liver sample snap frozen at  $-80^{\circ}\text{C}$  in RNAlater<sup>®</sup> solution (Invitrogen, Thermofisher). An equal amount of each sample (200 mg) was suspended in 600  $\mu\text{l}$  of TRIzol solution (Invitrogen, Thermofisher) together with 0.5 mm zirconium oxide beads (Next Advanced, NY). The homogenization of tissue was performed using a Bullet Blender (Next Advanced, NY) at a speed of 8 rpm for three minutes at  $4^{\circ}\text{C}$ . The homogenized tissue was centrifuged at 12,000 g for ten minutes at  $4^{\circ}\text{C}$ , and the collected supernatant was subjected to RNA extraction according to manufacturer's protocol. Briefly, 200  $\mu\text{l}$  of chloroform was added to each sample and after three minutes recovery at RT, samples were centrifuged at 12,000 g for 15 minutes at  $4^{\circ}\text{C}$ . Chloroform-RNA phase was collected, and isopropanol was added. After ten minutes recovery at RT, samples were centrifuged at 12,000 g for ten minutes  $4^{\circ}\text{C}$ . The pelleted RNA was washed with absolute ethanol and centrifuged at 12,000 g for five minutes  $4^{\circ}\text{C}$ . The isolated RNA was suspended in RNase free water and quantified by NanoDrop 2000 (Thermofisher); then, a total amount of 200 ng of RNA per sample was retro-transcribed in a 20  $\mu\text{l}$  of total volume reaction using High Capacity cDNA Reverse Transcription Kit (Applied Biosystems, Thermofisher). The real time polymerase chain reaction (RT-PCR) was performed according to the chemistry of Power SYBR<sup>®</sup> Green PCR Master Mix (Applied Biosystems, Thermofisher), on 5 ng of cDNA and using specific oligonucleotide primers (listed in the following table) and ran by StepOne Real Time System (Applied Biosystems, Thermofisher). The  $\Delta\Delta\text{Ct}$  method was used to quantify the expression of the genes of interests. All the values were normalized towards the Actin- $\beta$  (housekeeping gene) while livers from four healthy rats, named SHAM group, were used as reference samples. Data were expressed as Relative Quantification (RQ) mean  $\pm$  SEM.

## Supporting Information

| <b>Gene</b> | <b>Forward primer (5'→3')</b> | <b>Reverse primer (3'→5')</b> |
|-------------|-------------------------------|-------------------------------|
| ACTβ        | ACCGTGAAAAGATGACCCAGAT        | CACAGCCTGGATGGCTACGT          |
| BAX         | AGCAAACCTGGTGCTCAAGGC         | GCCACCCTGGTCTTGGATC           |
| BCL-2       | GAGGCTGGGATGCCTTTGT           | AGGCTGAGCAGCGTCTTCAG          |
| BECLIN-1    | TATCTGGCACAGCGGACAATT         | CCAGGCAGCATTGATTTTCATT        |
| CD14        | CTACCGACCATGAAGCTTATGCT       | CGTCCTGGTCCAGCTCACA           |
| CXCL-10     | CTGAGTCTGAGTGGGACTCAAGG       | GACAGGATAGACTTGCAGGAATGA      |
| e-NOS       | AGTTACCAGCTGGCCAAAGTGA        | ACGATCCAGGCCAGTCA             |
| E-SELECTIN  | ACACAGCTTCCTGTACCAACACAT      | CCTGTTCTTGGCAGGTCACA          |
| ICAM1       | ATCACTGTGTATTTCGTTCCCAGAG     | CACGGAGCAGCACTACTGAGAG        |
| IL-6        | AGAAAAGAGTTGTGCAATGGCAAT      | CATCCATCATTTCCTTGTATTTCTGG    |
| mTOR        | ATTGCCAGCCTCATTGGAGT          | TCTCCATGACAACCTGGATCACTTG     |
| NF-kB       | CATCACCCATGGCACCATAA          | CGGTCTTGGTGCTGGCC             |
| P-SELECTIN  | AACCTGCAAAGGTGTAACATCACTT     | GTTTCGGACCAAAGCTTTCCA         |
| SOD1        | CAATACACAAGGCTGTACCACTGC      | AGGTCTCCAACATGCCTCTCTTC       |
| TLR4        | GAATCCCTGCATAGAGGTACTTCCTA    | TTGAAGCTCAGATCTAGGTTCTTG      |
| ULK-1       | CCTACTAAGGCTGGACCCTCG         | GCAGTGTACGGTCCGAGGT           |
| VCAM1       | TGTCAACGTTGCTCCGAAAG          | CTTTAGCTGTCTGCTCCACAGGA       |

Forward and reverse oligonucleotides sequences of RT-PCR primers.
