# Supplementary material for: Human liver stem cell‐derived extracellular vesicles reduce injury in a model of normothermic machine perfusion of rat livers previously exposed to a prolonged warm ischemia
Source: PubMed Central journal article supplement — Transpl Int. 2021 Aug 26;34(9):1607–17. doi: 10.1111/tri.13980 (PMC9291857; doi:10.1111/tri.13980), 2021-08-26
Supplement: TRI-34-1607-s003.pdf [file TRI-34-1607-s003.pdf]

### **Panel S1: ISOLATION, CHARACTERIZATION AND CULTURE OF HLSCs**

The HLSCs were isolated from human cryopreserved hepatocytes obtained from Lonza, Bioscience (Basel, Switzerland). The HLSCs were cultured in a medium containing a 3:1 proportion of  $\alpha$ -minimum essential medium and endothelial cell basal medium-1, supplemented with L-glutamine 2 mM, penicillin 100 U/mL, streptomycin 100  $\mu$ g/mL and 10% fetal calf serum ( $\alpha$ -MEM/EBM/FCS), and maintained in a humidified 5% CO<sub>2</sub> incubator at 37°C.[17] HLSC at passages 5 to 8 were used in all the experiments.
