# Supplementary material for: Human liver stem cell‐derived extracellular vesicles reduce injury in a model of normothermic machine perfusion of rat livers previously exposed to a prolonged warm ischemia
Source: PubMed Central journal article supplement — Transpl Int. 2021 Aug 26;34(9):1607–17. doi: 10.1111/tri.13980 (PMC9291857; doi:10.1111/tri.13980), 2021-08-26

**Figure S4: (a)** Protein levels measured by Western Blot analysis of VCAM-1, P-Selectin and E-Selectin normalized to GAPDH. Data are represented as mean  $\pm$  SEM. **(b)** Representative image of Western Blot of NMP, WI, WI+EV1, WI+EV2 groups blotted with VCAM-1, P-Selectin and E-Selectin and endogenous control GAPDH.

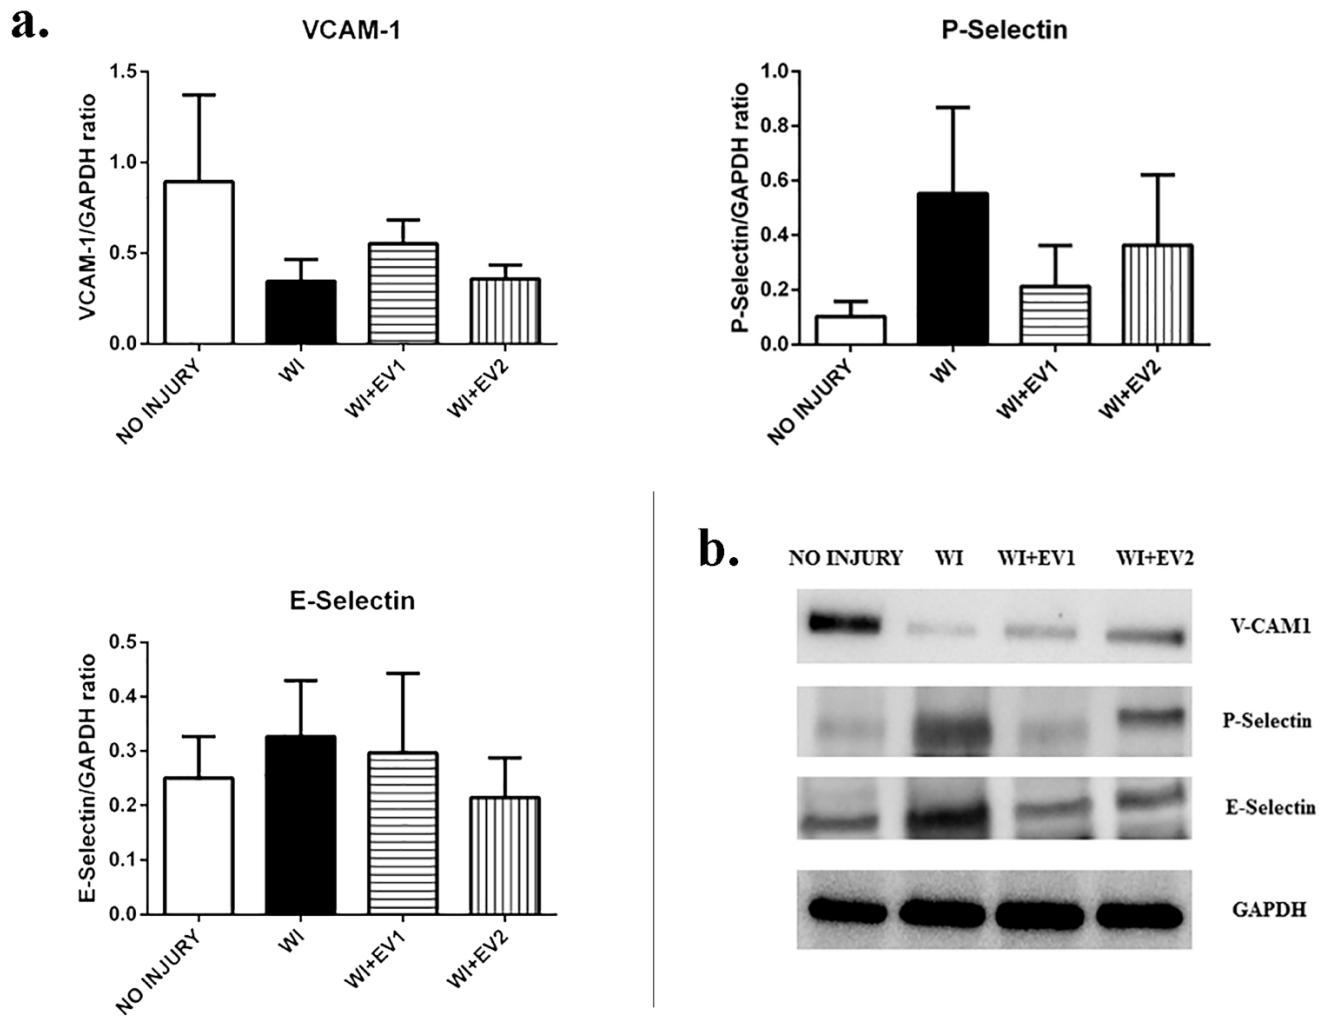

Supplement: TRI-34-1607-s004.pdf [file TRI-34-1607-s004.pdf]
