# Supplementary material for: Human liver stem cell‐derived extracellular vesicles reduce injury in a model of normothermic machine perfusion of rat livers previously exposed to a prolonged warm ischemia
Source: PubMed Central journal article supplement — Transpl Int. 2021 Aug 26;34(9):1607–17. doi: 10.1111/tri.13980 (PMC9291857; doi:10.1111/tri.13980), 2021-08-26

**Figure S1: MACSPlex ASSAY OF HLSC-EVs**

Cytofluorimetric characterization of HLSC-EVs by multiplex bead-based flow cytometry assay: 39 multiplexed populations of dye-labeled antibody-coated capture beads were incubated with HLSC-EVs samples. Captured HLSC-EVs were counterstained with pan tetraspanins APC-labeled detection antibodies. The graph shows a quantification of the median APC fluorescence values for all bead populations after background correction (medium control values subtracted from measured HLSC-EVs values) of a representative HLSC-EV preparation.

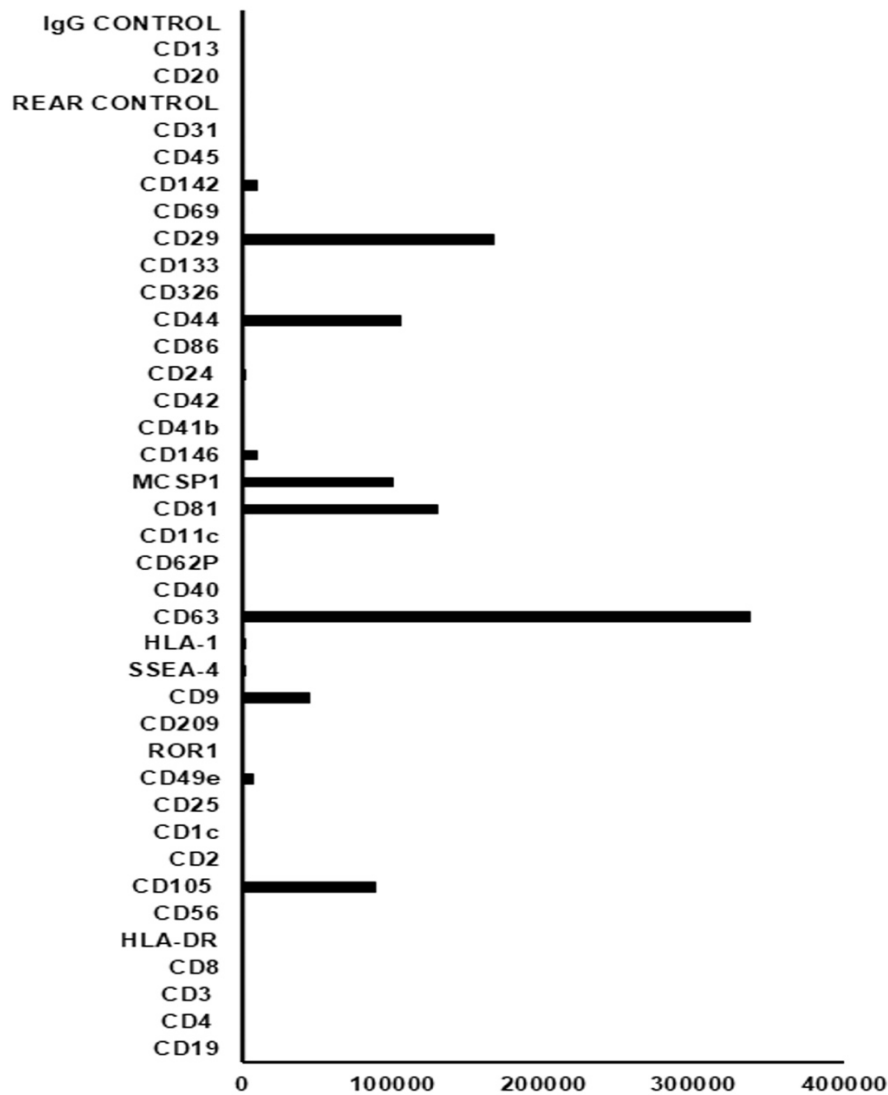

Supplement: TRI-34-1607-s006.pdf [file TRI-34-1607-s006.pdf]
