# Supplementary material for: Human liver stem cell‐derived extracellular vesicles reduce injury in a model of normothermic machine perfusion of rat livers previously exposed to a prolonged warm ischemia
Source: PubMed Central journal article supplement — Transpl Int. 2021 Aug 26;34(9):1607–17. doi: 10.1111/tri.13980 (PMC9291857; doi:10.1111/tri.13980), 2021-08-26

**Figure S2: SURGICAL PROCEDURE**

After general anesthesia with Zolazepam+Tiletamine (Zoletil)(0.2 mg/Kg) and Xilazine (Rompun)(16 mg/Kg) and after intraperitoneal heparin administration (1000-1500 U), a midline laparotomy was performed to expose the liver. The common bile duct and the portal vein were cannulated with 22G and 18G cannulas respectively. The liver was flushed with 10 ml of either saline (ischemic livers) or Celsior® solution (healthy livers) and then removed from the abdomen.

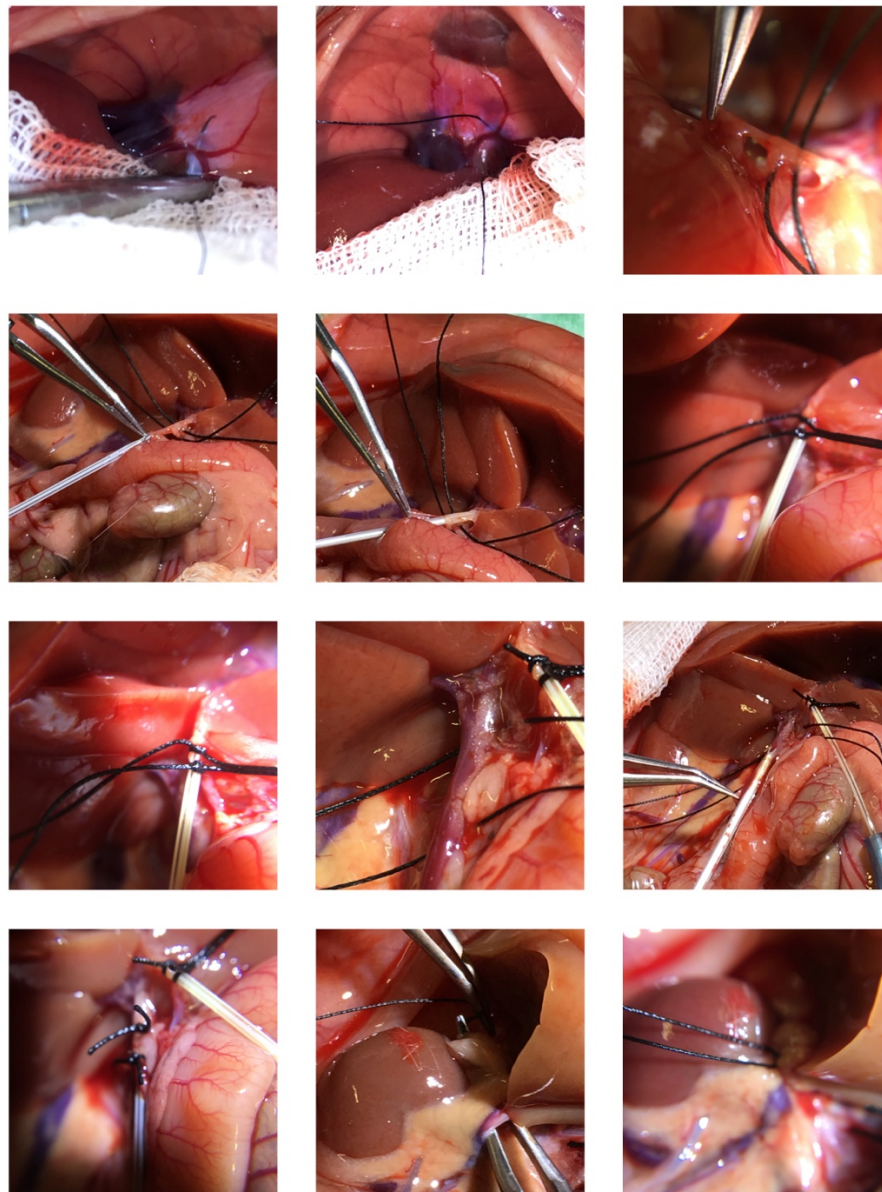

Supplement: TRI-34-1607-s007.pdf [file TRI-34-1607-s007.pdf]
