# Supplementary material for: Human liver stem cell‐derived extracellular vesicles reduce injury in a model of normothermic machine perfusion of rat livers previously exposed to a prolonged warm ischemia
Source: PubMed Central journal article supplement — Transpl Int. 2021 Aug 26;34(9):1607–17. doi: 10.1111/tri.13980 (PMC9291857; doi:10.1111/tri.13980), 2021-08-26
Supplement: TRI-34-1607-s008.pdf [file TRI-34-1607-s008.pdf]

**Table S2:** liver weight and operating parameters during NMP

|                               | <b>NO INJURY</b><br><i>(n=6)</i><br>Mean (SEM) | <b>WI</b><br><i>(n=6)</i><br>Mean (SEM) | <b>WI+EV1</b><br><i>(n=6)</i><br>Mean (SEM) | <b>WI+EV2</b><br><i>(n=6)</i><br>Mean (SEM) | <i>P value</i> |
|-------------------------------|------------------------------------------------|-----------------------------------------|---------------------------------------------|---------------------------------------------|----------------|
| <b>Liver weight [g]</b>       | 17.10 (1.93)                                   | 15.17 (0.83)                            | 14.17 (1.28)                                | 13.67 (1.17)                                | <b>0.40</b>    |
| <b>pO<sub>2</sub> [mmHg]</b>  | 487.4 (24.1)                                   | 448 (39.6)                              | 484.6 (38.3)                                | 517.9 (25.6)                                | <b>0.64</b>    |
| <b>Hematocrit [%]</b>         | 19.02 (0.47)                                   | 17.97 (0.50)                            | 18.56 (0.60)                                | 18.47 (0.62)                                | <b>0.47</b>    |
| <b>Portal pressure [mmHg]</b> | 15.69 (0.02)                                   | 15.19 (0.13)                            | 14.83 (0.14)                                | 14.98 (0.26)                                | <b>0.36</b>    |
