# Supplementary material for: Human liver stem cell‐derived extracellular vesicles reduce injury in a model of normothermic machine perfusion of rat livers previously exposed to a prolonged warm ischemia
Source: PubMed Central journal article supplement — Transpl Int. 2021 Aug 26;34(9):1607–17. doi: 10.1111/tri.13980 (PMC9291857; doi:10.1111/tri.13980), 2021-08-26

## Supporting Information

**Figure S3:** RT-PCR relative quantification mean (RQ mean) of RNA expression after 6 hours of ex-vivo NMP in SHAM, NO INJURY, WI, WI+EV1 and WI+EV2 groups. Livers from four healthy rats (SHAM group) were used as reference samples. All values were normalized to Actin- $\beta$ . Data are represented as mean  $\pm$  SEM.

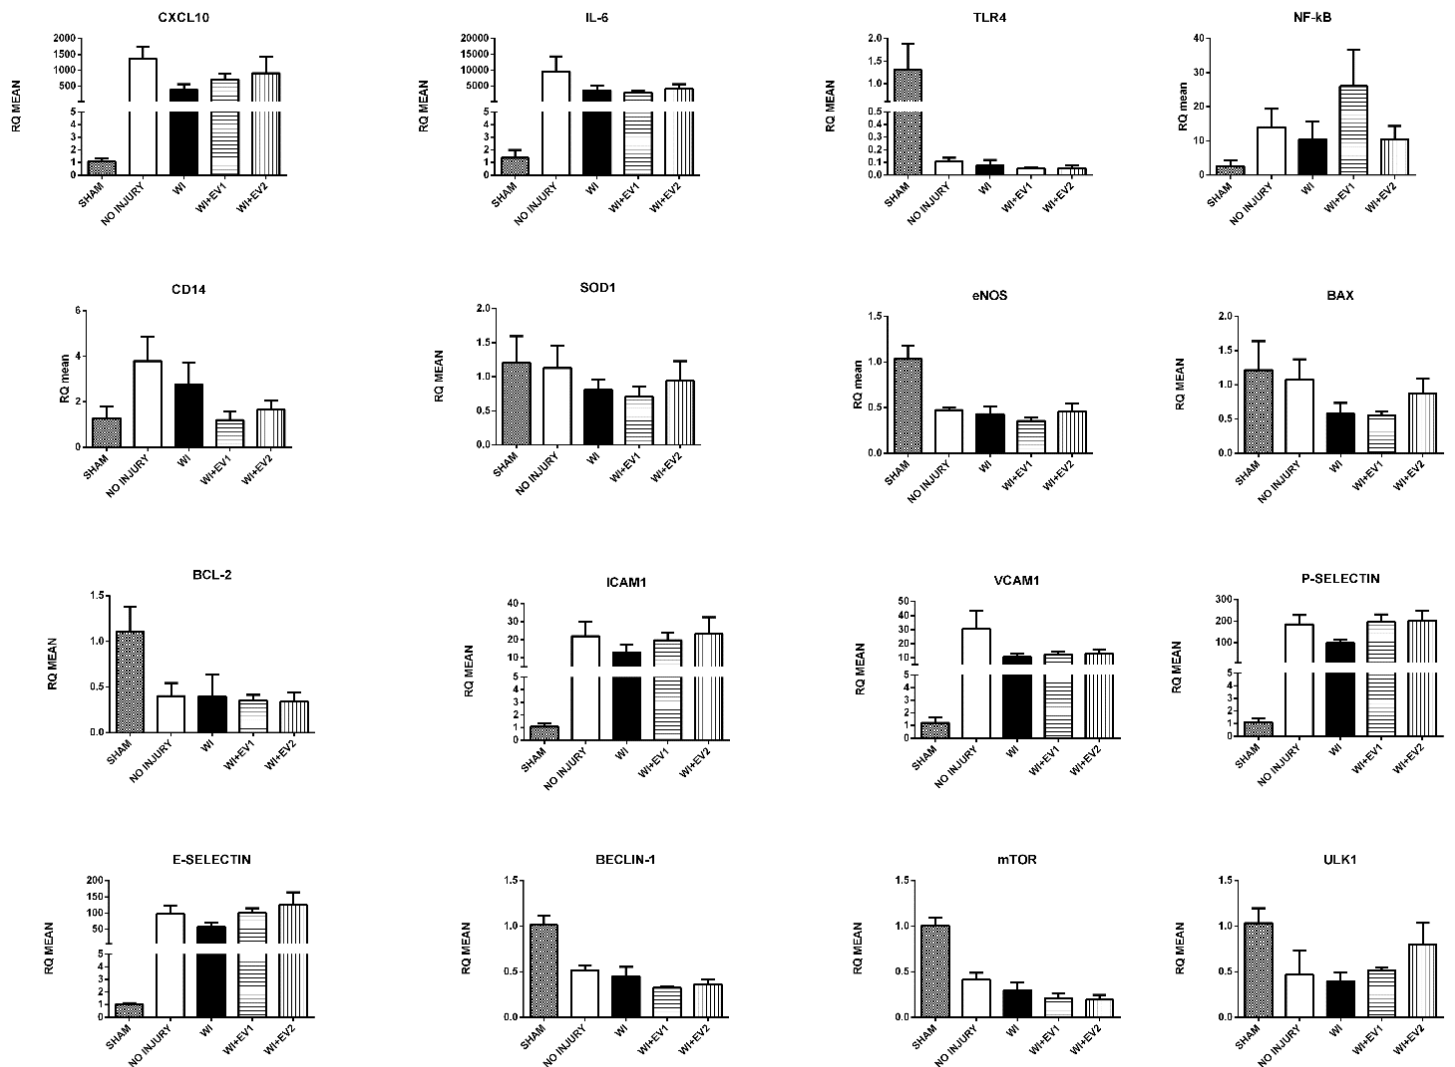

Supplement: TRI-34-1607-s009.pdf [file TRI-34-1607-s009.pdf]
